# Supplementary material for: Impact of post monsoon crop residue burning on PM 2.5 over North India: Optimizing emissions using a high-density in situ surface observation network
Source: Copernicus journal article supplement (doi:10.5194/egusphere-2024-1811), 2024-10-22
Supplement: Supplementary file 1 [file egusphere-2024-1811-supplement.pdf]

## Supplement

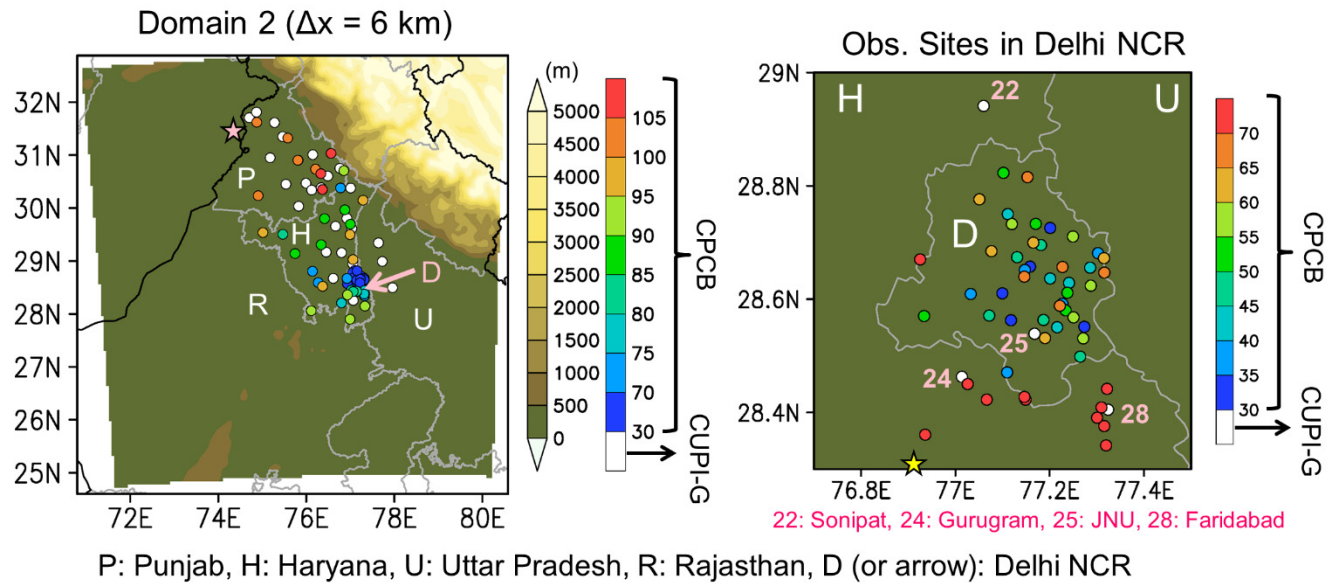

**Figure S1:** (left) Same as Fig. 1 but the CUPi-G and CPCB sites are depicted as white and colored circles, respectively. (right) Enlarged view of (left) near Delhi NCR. Sites in Delhi NCR are categorized as Delhi NCR for the site-mean values of CPCB, whereas nearby sites such as (24) Gurugram, (25) JNU, and (28) Faridabad are included as Delhi NCR for the site-mean values of CUPi-G, following the definition of Singh et al. (2023) (See Figs. 3, 4 7, and 8). The AERONET stations are marked as stars, including (pink in D01) Lahore and (yellow in D02) Amity University Gurgaon.

**Table S1:** List of CPCB and CUPI-G stations used in the study. Selected sites are marked with station numbers for PM<sub>2.5</sub> and CO in respective columns.

|    | Name                            | Long. | Lat.  | PM <sub>2.5</sub> | CO | Category             |
|----|---------------------------------|-------|-------|-------------------|----|----------------------|
| 1  | Kohali                          | 74.70 | 31.71 | 1                 |    | CUPI-G, Source       |
| 2  | Khatrai Kalan                   | 74.87 | 31.81 |                   |    |                      |
| 3  | Gaggar Bhana                    | 75.28 | 31.61 | 3                 |    |                      |
| 4  | Sadarkot                        | 75.18 | 30.95 | 4                 |    |                      |
| 5  | Budo Pandher                    | 75.46 | 31.35 | 5                 |    |                      |
| 6  | PAU                             | 75.82 | 30.90 |                   |    |                      |
| 7  | Rahon                           | 76.15 | 31.01 |                   | -  |                      |
| 8  | Thikriwala                      | 75.54 | 30.45 | 8                 |    |                      |
| 9  | Beauscape Farm                  | 75.99 | 30.47 | 9                 |    |                      |
| 10 | Chajjli                         | 75.83 | 30.03 | 10                |    |                      |
| 11 | Nabha                           | 76.12 | 30.34 | 11                |    |                      |
| 12 | Patiala                         | 76.34 | 30.39 | 12                |    |                      |
| 13 | Chandigarh                      | 76.76 | 30.75 | 13                |    |                      |
| 14 | Khera                           | 76.49 | 30.60 | 14                |    |                      |
| 15 | Karsana                         | 77.01 | 30.38 |                   |    | CUPI-G, Intermediate |
| 16 | Ruksana                         | 76.67 | 29.66 |                   |    |                      |
| 17 | Taraori                         | 76.92 | 29.81 | 17                |    |                      |
| 18 | Lajwana Kalan                   | 76.45 | 29.17 | 18                |    |                      |
| 19 | Khanpur Kalan                   | 76.80 | 29.16 | 19                | -  |                      |
| 20 | Pipalwali                       | 77.03 | 29.62 | 20                |    |                      |
| 21 | Dujana                          | 76.61 | 28.67 |                   |    |                      |
| 22 | Sonipat                         | 77.06 | 28.94 | 22                |    |                      |
| 23 | Muzaffarnagar (UP)              | 77.64 | 29.34 | 23                |    |                      |
| 24 | Gurugram                        | 77.01 | 28.46 | 24                |    | CUPI-G, Delhi NCR    |
| 25 | JNU, New Delhi                  | 77.17 | 28.54 | 25                |    |                      |
| 26 | Meerut (U.P.)                   | 77.73 | 28.99 |                   | -  |                      |
| 27 | Gurugram (Sohna)                | 77.07 | 28.26 |                   |    |                      |
| 28 | Faridabad(Sector16)             | 77.32 | 28.41 | 28                |    |                      |
| 29 | Aurangabad (UP)                 | 77.96 | 28.50 |                   |    |                      |
| 30 | CRRRI Mathura Road, Delhi - IMD | 77.27 | 28.55 | 30                |    | CPCB, Delhi NCR      |
| 31 | Burari Crossing, Delhi - IMD    | 77.20 | 28.73 | 31                |    |                      |
| 32 | North Campus, DU, Delhi - IMD   | 77.16 | 28.66 | 32                |    |                      |
| 33 | IGI Airport (T3), Delhi - IMD   | 77.12 | 28.56 | 33                |    |                      |
| 34 | Pusa_IMD, Delhi - IMD           | 77.10 | 28.61 | 34                | 34 |                      |
| 35 | Aya Nagar, Delhi - IMD          | 77.11 | 28.47 |                   |    |                      |

|    |                                                  |       |       |    |    |                  |
|----|--------------------------------------------------|-------|-------|----|----|------------------|
| 36 | Lodhi_IMD, Delhi - IMD                           | 77.23 | 28.59 | 36 |    |                  |
| 37 | Shadipur, Delhi - CPCB                           | 77.15 | 28.65 |    |    |                  |
| 38 | IHBAS, Dilshad Garden, Delhi - CPCB              | 77.30 | 28.68 | 38 | 38 |                  |
| 39 | NSIT Dwarka, Delhi - CPCB                        | 77.03 | 28.61 |    | 39 |                  |
| 40 | East Arjun Nagar, Delhi - CPCB                   | 77.29 | 28.66 |    |    |                  |
| 41 | ITO, Delhi - CPCB                                | 77.24 | 28.63 | 41 |    |                  |
| 42 | DTU, Delhi - CPCB                                | 77.11 | 28.75 |    |    |                  |
| 43 | Sirifort, Delhi - CPCB                           | 77.22 | 28.55 | 43 |    |                  |
| 44 | Mandir Marg, Delhi - DPCC                        | 77.20 | 28.64 |    |    |                  |
| 45 | R K Puram, Delhi - DPCC                          | 77.19 | 28.56 | 45 | 45 |                  |
| 46 | Punjabi Bagh, Delhi - DPCC                       | 77.13 | 28.67 | 46 |    |                  |
| 47 | Ashok Vihar, Delhi - DPCC                        | 77.18 | 28.70 | 47 |    |                  |
| 48 | Dr. Karni Singh Shooting Range, Delhi - DPCC     | 77.26 | 28.50 | 48 |    |                  |
| 49 | Dwarka-Sector 8, Delhi - DPCC                    | 77.07 | 28.57 | 49 |    |                  |
| 50 | Jahangirpuri, Delhi - DPCC                       | 77.17 | 28.73 | 50 |    |                  |
| 51 | Jawaharlal Nehru Stadium, Delhi - DPCC           | 77.23 | 28.58 | 51 |    |                  |
| 52 | Major Dhyan Chand National Stadium, Delhi - DPCC | 77.24 | 28.61 | 52 |    | CPCB, Delhi, NCR |
| 53 | Narela, Delhi - DPCC                             | 77.10 | 28.82 | 53 |    |                  |
| 54 | Najafgarh, Delhi - DPCC                          | 76.93 | 28.57 | 54 |    |                  |
| 55 | Okhla Phase-2, Delhi - DPCC                      | 77.27 | 28.53 | 55 |    |                  |
| 56 | Nehru Nagar, Delhi - DPCC                        | 77.25 | 28.57 | 56 |    |                  |
| 57 | Rohini, Delhi - DPCC                             | 77.12 | 28.73 | 57 |    |                  |
| 58 | Patparganj, Delhi - DPCC                         | 77.29 | 28.62 | 58 |    |                  |
| 59 | Sonia Vihar, Delhi - DPCC                        | 77.25 | 28.71 | 59 |    |                  |
| 60 | Wazirpur, Delhi - DPCC                           | 77.17 | 28.70 | 60 |    |                  |
| 61 | Vivek Vihar, Delhi - DPCC                        | 77.32 | 28.67 | 61 |    |                  |
| 62 | Bawana, Delhi - DPCC                             | 77.05 | 28.78 | 62 |    |                  |
| 63 | Mundka, Delhi - DPCC                             | 77.08 | 28.68 | 63 | 63 |                  |
| 64 | Sri Aurobindo Marg, Delhi - DPCC                 | 77.19 | 28.53 | 64 |    |                  |
| 65 | Pusa_DPCC, Delhi - DPCC                          | 77.15 | 28.64 | 65 |    |                  |
| 66 | Anand Vihar, Delhi - DPCC                        | 77.32 | 28.65 | 66 |    |                  |
| 67 | Alipur, Delhi - DPCC                             | 77.15 | 28.82 | 67 | 67 |                  |
| 68 | Chandni Chowk, Delhi - IITM                      | 77.23 | 28.66 |    |    |                  |
| 69 | Lodhi_IITM, Delhi - IITM                         | 77.22 | 28.59 |    |    |                  |
| 70 | Patti Mehar, Ambala - HSPCB                      | 76.78 | 30.38 | 70 |    |                  |
| 71 | Arya Nagar, Bahadurgarh - HSPCB                  | 76.93 | 28.67 | 71 |    |                  |
| 72 | Nathu Colony, Ballabgarh - HSPCB                 | 77.32 | 28.34 |    |    | CPCB, Haryana    |
| 73 | H.B. Colony, Bhiwani - HSPCB                     | 76.14 | 28.81 | 73 |    |                  |

|     |                                                 |       |       |     |     |                |
|-----|-------------------------------------------------|-------|-------|-----|-----|----------------|
| 74  | Mini Secretariat, Charkhi Dadri - HSPCB         | 76.27 | 28.59 | 74  |     |                |
| 75  | Municipal Corporation Office, Dharuhera - HSPCB | 76.80 | 28.21 |     |     |                |
| 76  | Sector- 16A, Faridabad - HSPCB                  | 77.31 | 28.41 | 76  |     |                |
| 77  | New Industrial Town, Faridabad - HSPCB          | 77.30 | 28.39 | 77  | 77  |                |
| 78  | Sector 30, Faridabad - HSPCB                    | 77.32 | 28.44 |     |     |                |
| 79  | Sector 11, Faridabad - HSPCB                    | 77.32 | 28.38 |     |     |                |
| 80  | Huda Sector, Fatehabad - HSPCB                  | 75.47 | 29.50 | 80  |     |                |
| 81  | Vikas Sadan, Gurugram - HSPCB                   | 77.03 | 28.45 |     |     |                |
| 82  | NISE Gwal Pahari, Gurugram - IMD                | 77.15 | 28.42 | 82  |     |                |
| 83  | Teri Gram, Gurugram - HSPCB                     | 77.15 | 28.43 | 83  | 83  |                |
| 84  | Sector-51, Gurugram – HSPCB                     | 77.07 | 28.42 |     |     |                |
| 85  | Urban Estate-II, Hisar - HSPCB                  | 75.74 | 29.14 | 85  |     |                |
| 86  | Police Lines, Jind - HSPCB                      | 76.34 | 29.31 | 86  |     | CPCB, Haryabna |
| 87  | Rishi Nagar, Kaithal – HSPCB                    | 76.42 | 29.80 | 87  |     |                |
| 88  | Sector-12, Karnal - HSPCB                       | 77.00 | 29.70 | 88  |     |                |
| 89  | Sector-7, Kurukshetra - HSPCB                   | 76.88 | 29.97 | 89  |     |                |
| 90  | General Hospital, Mandikhera - HSPCB            | 76.99 | 27.90 |     |     |                |
| 91  | Sector-2 IMT, Manesar - HSPCB                   | 76.94 | 28.36 | 91  |     |                |
| 92  | Shastri Nagar, Narnaul - HSPCB                  | 76.11 | 28.06 | 92  | 92  |                |
| 93  | Shyam Nagar, Palwal - HSPCB                     | 77.33 | 28.15 |     | 93  |                |
| 94  | Sector-6, Panchkula - HSPCB                     | 76.85 | 30.71 | 94  |     |                |
| 95  | Sector-18, Panipat - HSPCB                      | 76.99 | 29.50 |     |     |                |
| 96  | MD University, Rohtak - HSPCB                   | 76.37 | 28.52 |     |     |                |
| 97  | F-Block, Sirsa - HSPCB                          | 75.02 | 29.54 |     |     |                |
| 98  | Murthal, Sonipat - HSPCB                        | 77.06 | 29.03 | 98  | 98  |                |
| 99  | Gobind Pura, Yamuna Nagar - HSPCB               | 77.29 | 30.15 | 99  |     |                |
| 100 | Golden Temple, Amritsar – PPCB                  | 74.88 | 31.62 | 100 |     |                |
| 101 | Hardev Nagar, Bathinda - PPCB                   | 74.91 | 30.23 |     |     |                |
| 102 | Civil Line, Jalandhar - PPCB                    | 75.58 | 31.32 | 102 |     |                |
| 103 | Kalal Majra, Khanna - PPCB                      | 76.21 | 30.74 | 103 |     |                |
| 104 | Punjab Agricultural University, Ludhiana - PPCB | 75.81 | 30.90 | 104 | 104 | CPCB, Punjab   |
| 105 | RIMT University, Mandi Gobindgarh - PPCB        | 76.33 | 30.65 | 105 | 105 |                |
| 106 | Model Town, Patiala - PPCB                      | 76.37 | 30.35 | 106 |     |                |
| 107 | Ratanpura, Rupnagar - Ambuja Cements            | 76.56 | 31.03 | 107 |     |                |

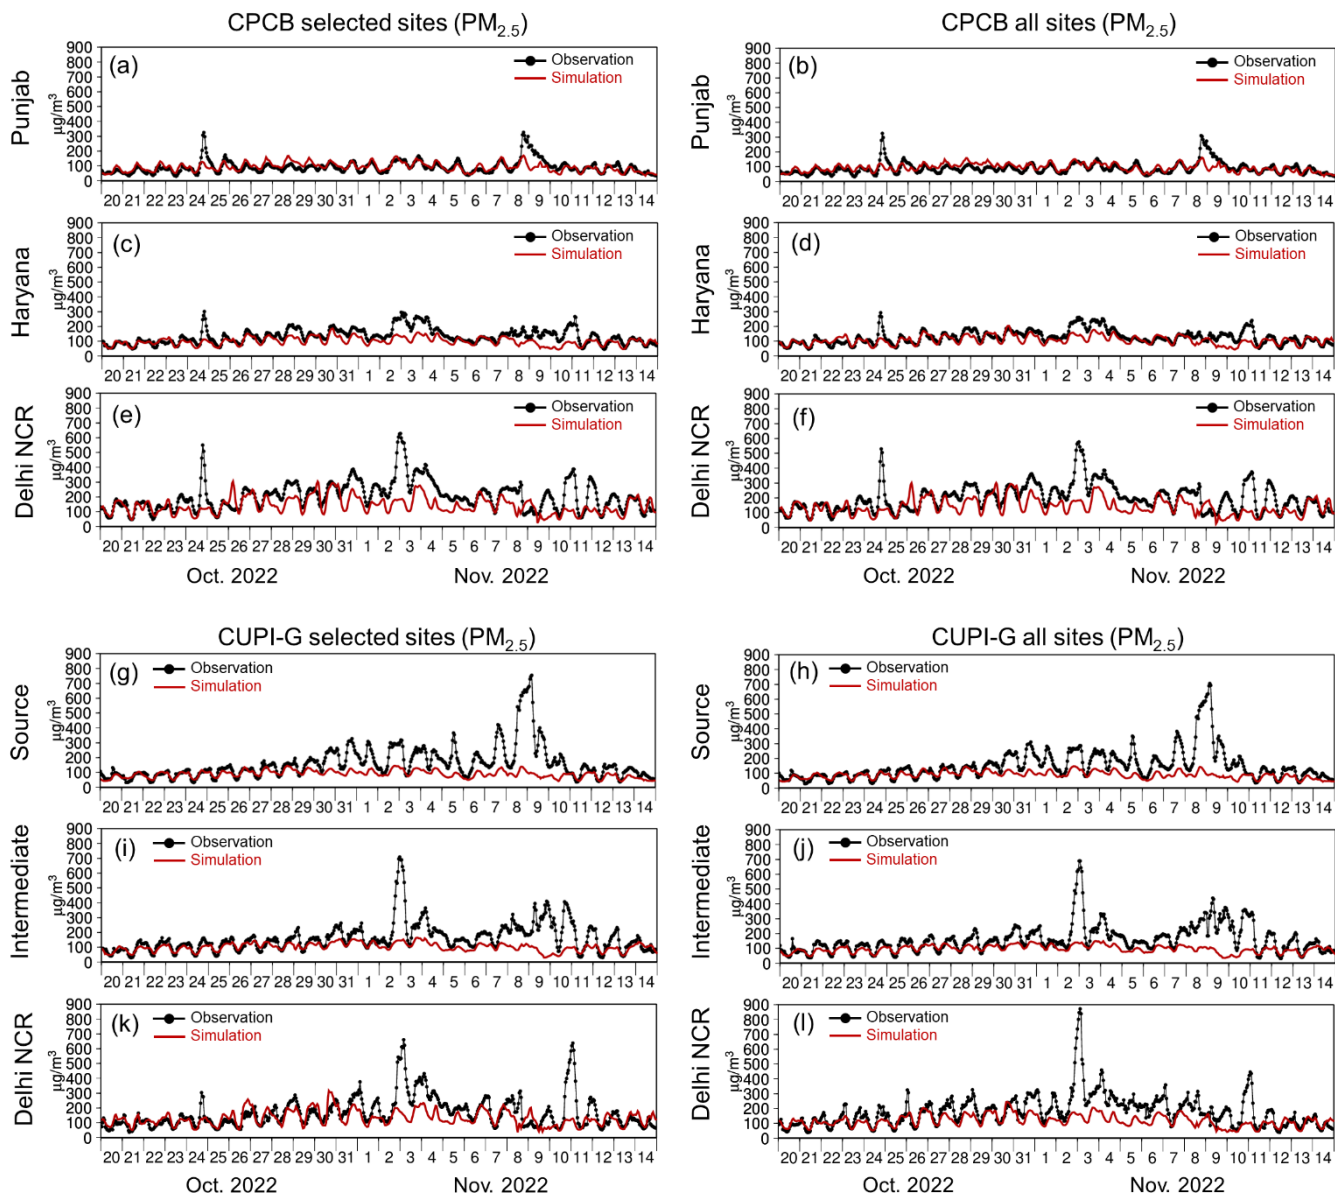

Figure S2: Same as Fig. 3 but for (left) selected stations and (right) all stations.

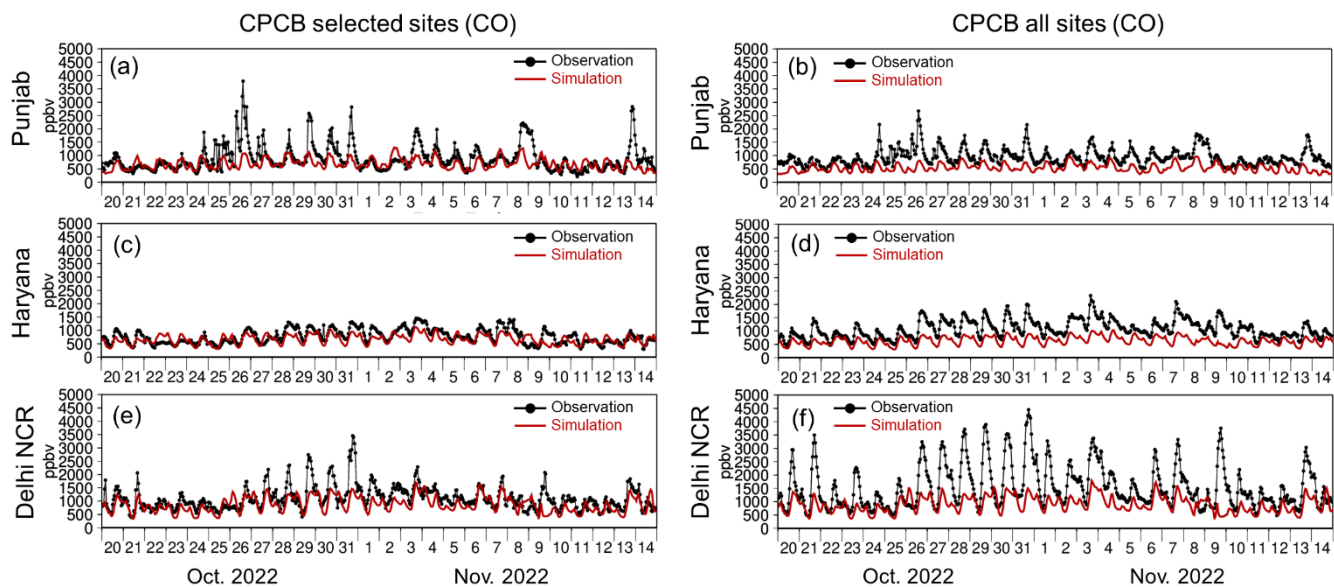

**Figure S3:** Same as Fig. S2 but for CO concentrations (ppbv) of CPCB stations.

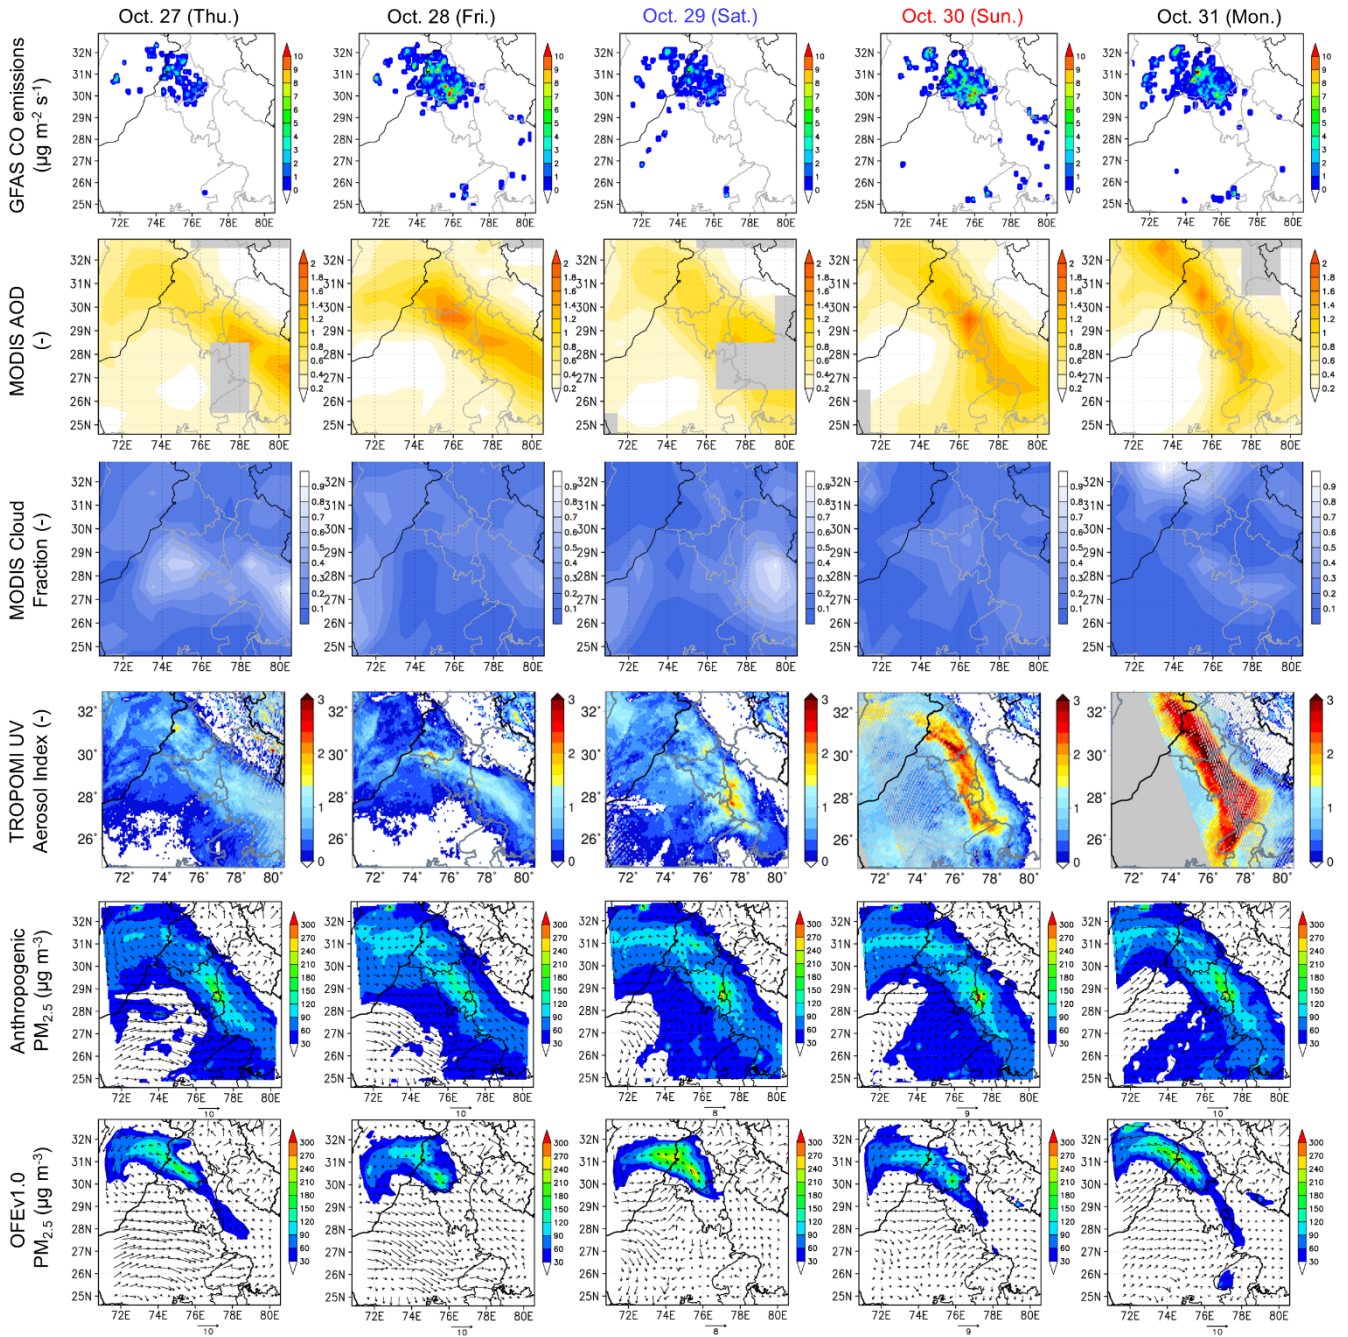

**Figure S4:** Spatial distribution of (top to bottom) daily mean GFAS CO emissions, MODIS AOD, MODIS Cloud Fraction, TROPOMI UV Aerosol Index, simulated surface concentrations of anthropogenic  $PM_{2.5}$ , simulated surface concentrations of CRB  $PM_{2.5}$  using OFEv1.0 from October 27 to 31, 2022. The simulated surface wind vectors are also shown in the  $PM_{2.5}$  maps. The Terra descending mode data (10:30 local time) is shown for MODIS. The time periods of the TROPOMI orbit shown in the figures are approximately 6:30–9:30 UTC (12:00–15:00 IST). The simulation time is 6:00 UTC (11:30 IST).

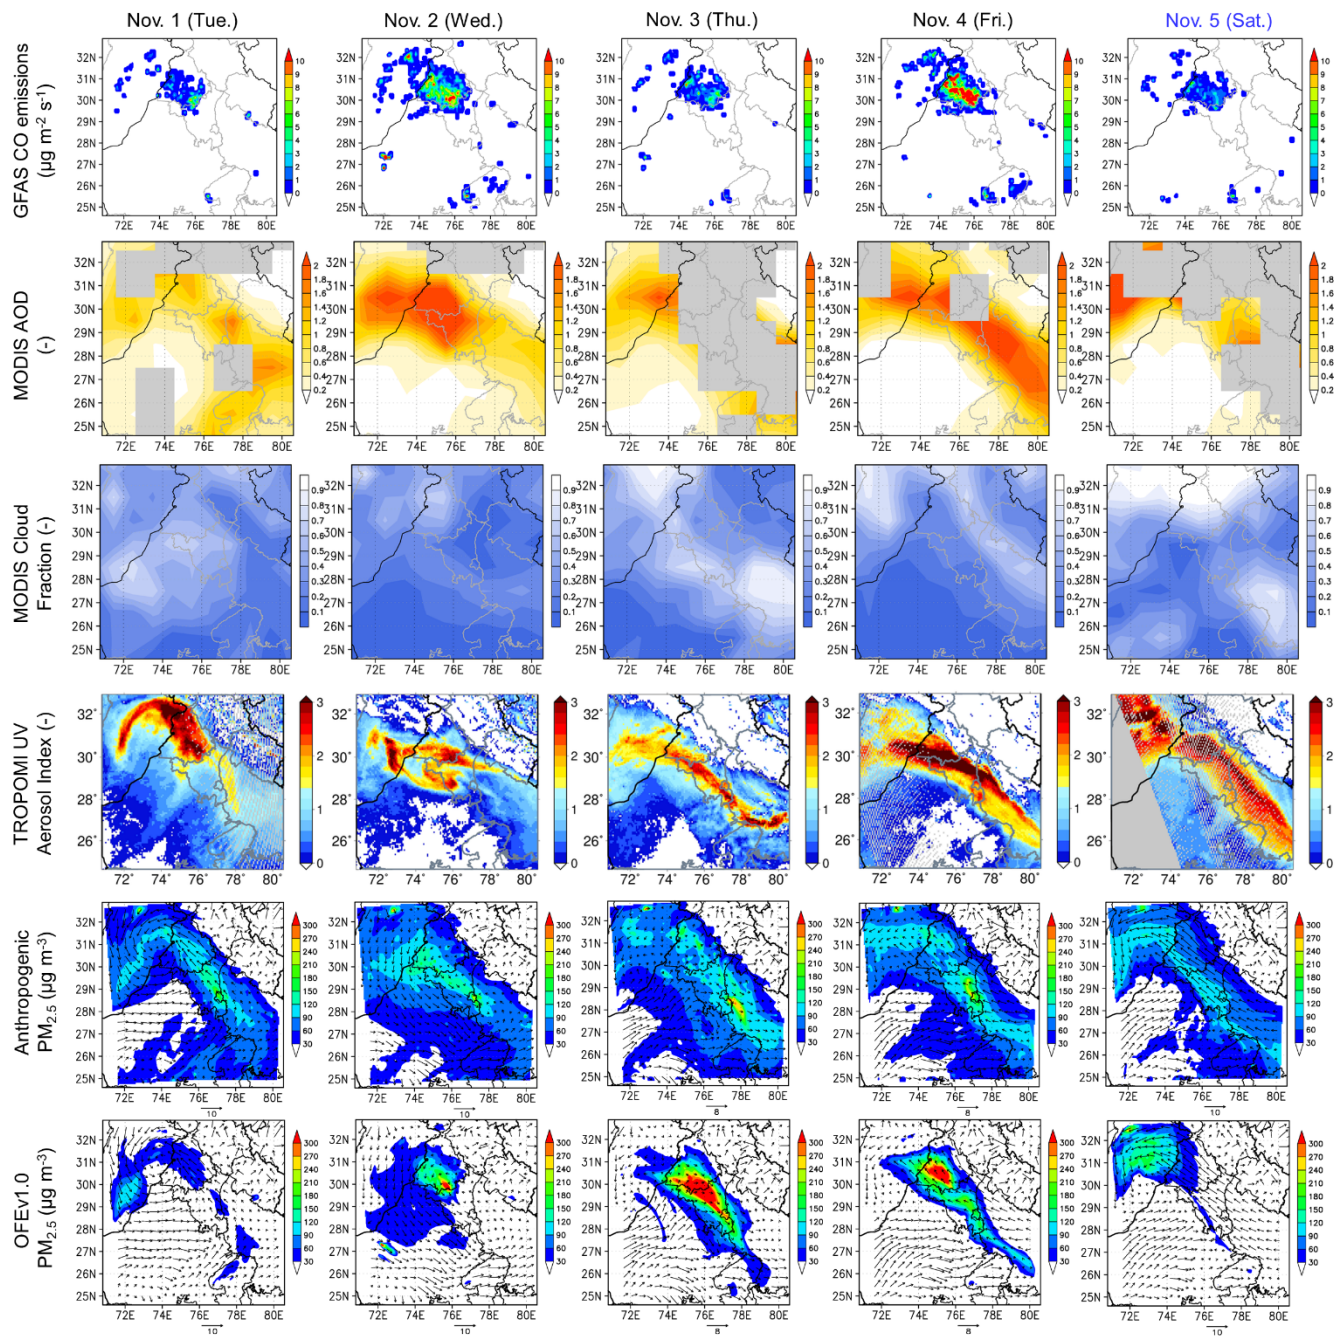

Figure S5: Same as Fig. S4 but from November 1 to 5, 2022.



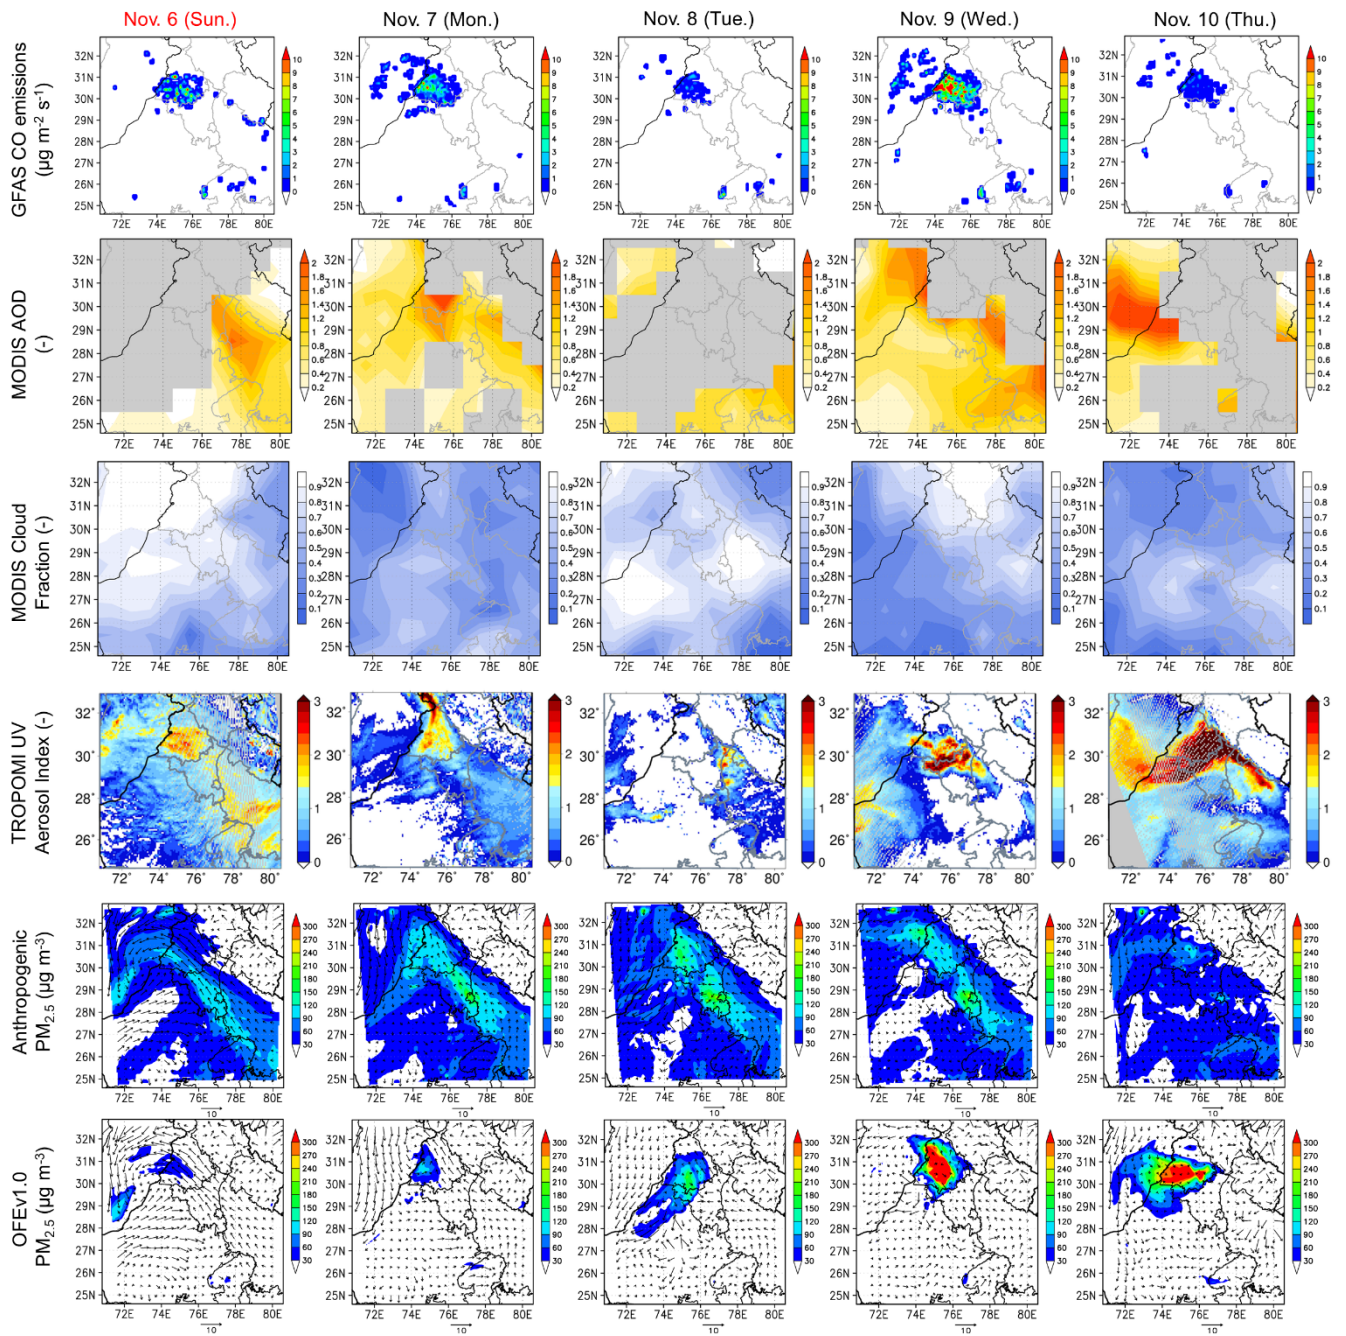

Figure S6: Same as Figs. S4 and S5 but from November 6 to 10, 2022.

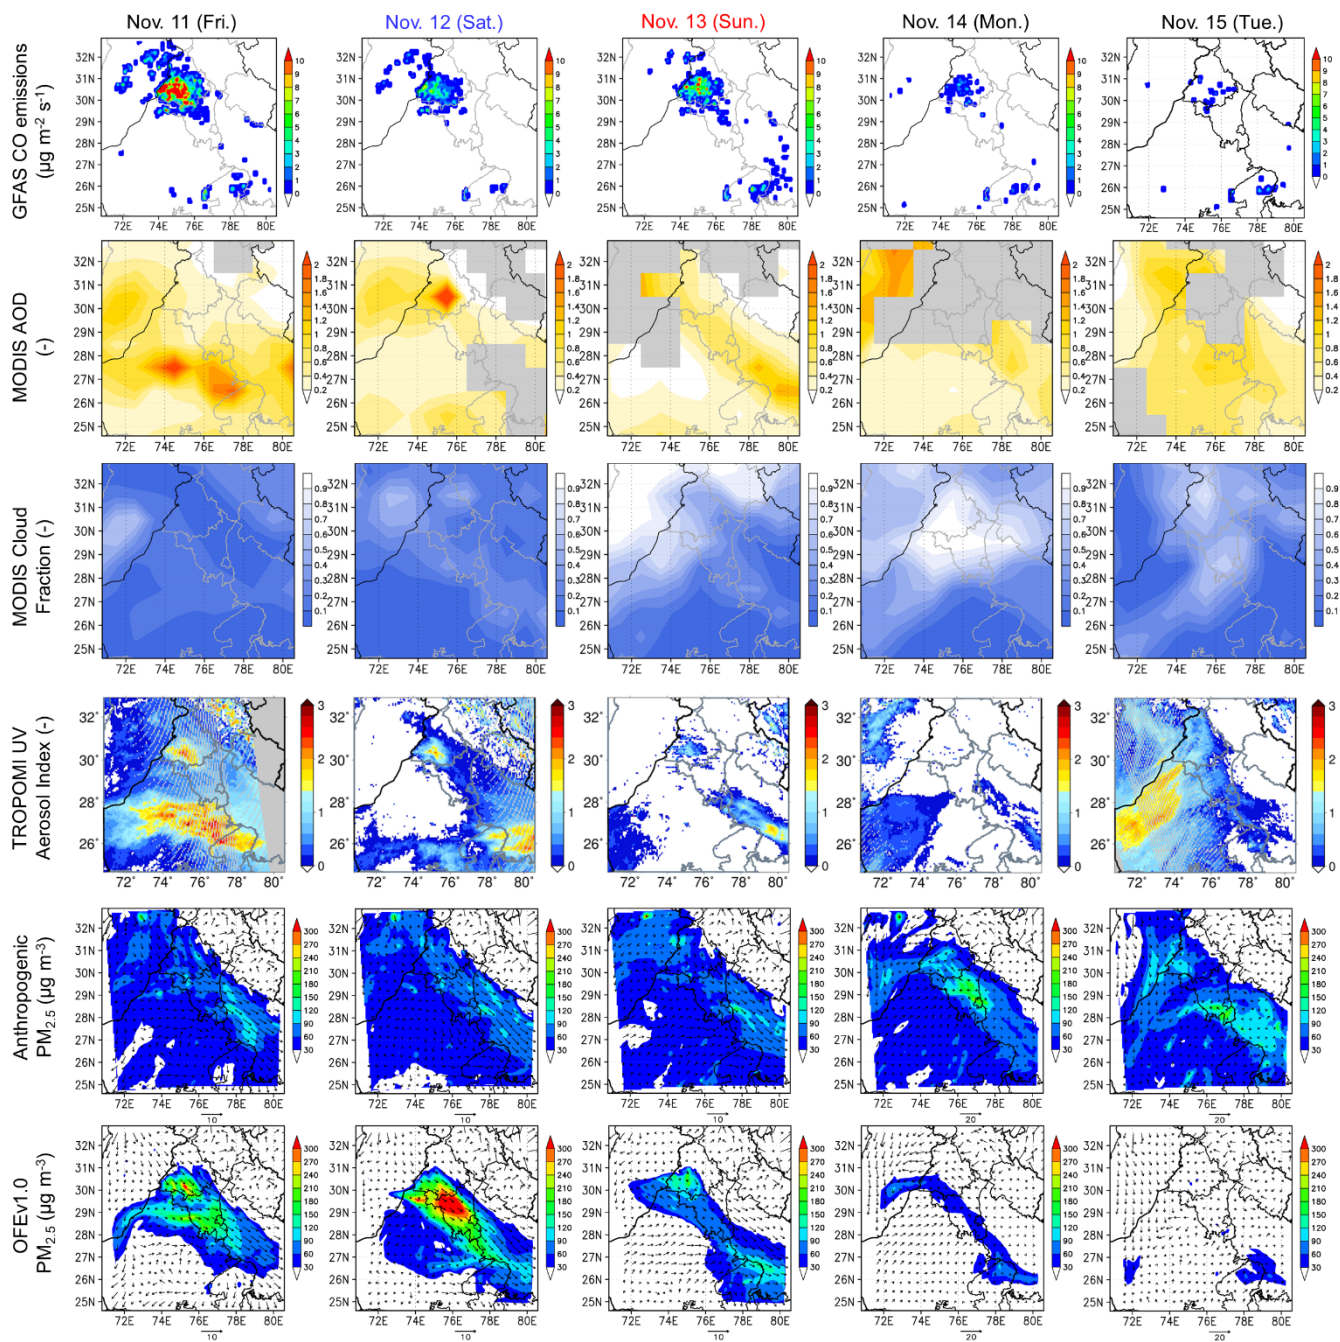

Figure S7: Same as Figs. S4–S6 but from November 11 to 15, 2022.

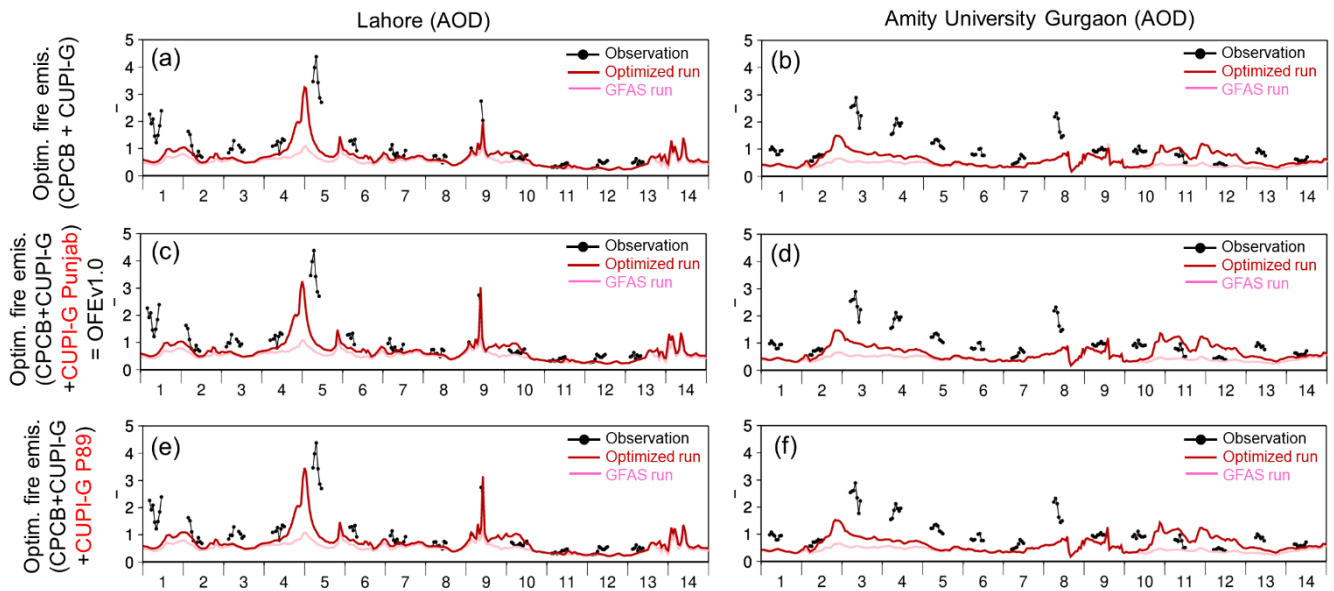

**Figure S8:** Time series of (black) AERONET observed and (red and pink) simulated AOD at 500 nm at (left) Lahore and (right) Amity University Gurgaon stations from November 1 to 15, 2022 (00:00 UTC). The red and pink lines indicate “Optimized” and “GFAS” runs, respectively.
